# Supplementary material
Source: MDPI journal article supplement (https://www.mdpi.com/2073-445X/12/2/342)
Supplement: s1 [file s1]

Supplemental Information for:

*Reimagining the Development of Downtown Cahokia Using Remote Sensing Visualizations from the Western Edge of the Grand Plaza*

J. Grant Stauffer, Seth B. Grooms, Lorraine W. Hu, Joy Mersmann, Tristram R. Kidder, and Edward R. Henry

**Table S1.** Results from our linear regression analysis of L:W ratios and area (m<sup>2</sup>) for structures we identified in the Grand Plaza. Highlighted structures are circular in shape and not easily attributable to Cahokia’s known chronological phases. Gray cells denote the lowest residual for each structure analyzed and grow darker in shade with each consecutive temporal phase.

| Site                | Building<br>Number<br>(FID) | Phase Association | Structure Type | Length | Width | L:W Ratio   | Perimeter (m) | Area (m <sup>2</sup> ) | Log Area | TLW/EM       | Lohmann      | Stirling     | Moorehead    |
|---------------------|-----------------------------|-------------------|----------------|--------|-------|-------------|---------------|------------------------|----------|--------------|--------------|--------------|--------------|
| Cahokia Grand Plaza | 0                           | TLW/EM            | Rectilinear    | 3.076  | 1.761 | 1.74673481  | 9.137         | 5.338                  | 1.67     | 0.704924588  | 0.831529926  | 1.176008802  | 1.829497331  |
| Cahokia Grand Plaza | 1                           | TLW/EM            | Rectilinear    | 3.065  | 2.254 | 1.359804791 | 9.849         | 6.615                  | 1.89     | 0.292310825  | 0.653589219  | 0.936314064  | 1.321814862  |
| Cahokia Grand Plaza | 2                           | Lohmann           | Rectilinear    | 3.209  | 1.527 | 2.101506221 | 8.651         | 4.585                  | 1.52     | 1.031529797  | 0.942966274  | 1.344066667  | 2.243269876  |
| Cahokia Grand Plaza | 3                           | TLW/EM            | Rectilinear    | 2.201  | 2.192 | 1.004105839 | 8.167         | 4.645                  | 1.54     | 0.465243887  | 1.042253695  | 1.268208987  | 1.407352692  |
| Cahokia Grand Plaza | 4                           | TLW/EM            | Rectilinear    | 4.452  | 2.576 | 1.72826087  | 12.688        | 11.117                 | 2.41     | -0.044271739 | 0.093538043  | 0.435068478  | 1.075761957  |
| Cahokia Grand Plaza | 5                           | TLW/EM            | Rectilinear    | 3.176  | 2.024 | 1.56916996  | 8.894         | 5.506                  | 1.71     | 0.576532806  | 0.810831225  | 1.126970751  | 1.657477866  |
| Cahokia Grand Plaza | 6                           | Lohmann           | Rectilinear    | 4.438  | 2.177 | 2.038585209 | 12.149        | 9.168                  | 2.22     | 0.300207717  | 0.249805788  | 0.640863987  | 1.496488103  |
| Cahokia Grand Plaza | 7                           | TLW/EM?           | Circular       | n/a    | n/a   | n/a         | 11.227        | 9.236                  | 2.22     | -0.105255367 | 0.338343026  | 0.599405428  | 0.890899909  |
| Cahokia Grand Plaza | 8                           | TLW/EM            | Rectilinear    | 3.512  | 2.095 | 1.676372315 | 9.887         | 6.548                  | 1.88     | 0.459898138  | 0.629178329  | 0.962427351  | 1.567182816  |
| Cahokia Grand Plaza | 9                           | Lohmann           | Rectilinear    | 5.028  | 2.746 | 1.831026948 | 13.572        | 12.4                   | 2.52     | -0.103114785 | -0.027632629 | 0.330299272  | 1.042168536  |
| Cahokia Grand Plaza | 10                          | Lohmann           | Rectilinear    | 4.294  | 2.875 | 1.493565217 | 12.274        | 10.916                 | 2.39     | -0.141103235 | 0.139049461  | 0.44312247   | 0.921265739  |
| Cahokia Grand Plaza | 11                          | TLW/EM            | Rectilinear    | 3.314  | 2.304 | 1.438368056 | 9.884         | 6.863                  | 1.93     | 0.291419618  | 0.605049392  | 0.900312934  | 1.340226649  |
| Cahokia Grand Plaza | 12                          | TLW/EM?           | Circular       | n/a    | n/a   | n/a         | 8.509         | 5.502                  | 1.71     | 0.355152843  | 0.859171928  | 1.104334672  | 1.326831014  |
| Cahokia Grand Plaza | 13                          | TLW/EM            | Rectilinear    | 4.281  | 2.441 | 1.753789431 | 12.106        | 9.551                  | 2.26     | 0.118436379  | 0.240763089  | 0.586367882  | 1.244742442  |
| Cahokia Grand Plaza | 14                          | Stirling          | Rectilinear    | 5.306  | 3.736 | 1.420235546 | 15.867        | 16.951                 | 2.83     | -0.617606745 | -0.292979604 | -0.000610011 | 0.426745128  |
| Cahokia Grand Plaza | 15                          | TLW/EM            | Rectilinear    | 3.452  | 2.316 | 1.490500864 | 10.91         | 7.764                  | 2.05     | 0.19737133   | 0.479382556  | 0.782966494  | 1.258987392  |
| Cahokia Grand Plaza | 16                          | Lohmann           | Rectilinear    | 5.317  | 2.876 | 1.848748261 | 15.292        | 14.826                 | 2.7      | -0.274293115 | -0.209558936 | 0.151201287  | 0.875344332  |
| Cahokia Grand Plaza | 17                          | Moorehead         | Rectilinear    | 7.149  | 4.479 | 1.596115204 | 22.003        | 31.509                 | 3.45     | -1.150053851 | -0.932097723 | -0.611657736 | -0.062488346 |
| Cahokia Grand Plaza | 18                          | Stirling          | Rectilinear    | 5.322  | 3.173 | 1.677277025 | 15.097        | 15.368                 | 2.73     | -0.389651497 | -0.220920013 | 0.112473401  | 0.717855468  |
| Cahokia Grand Plaza | 19                          | Stirling          | Rectilinear    | 5.778  | 3.225 | 1.791627907 | 16.768        | 17.69                  | 2.87     | -0.472727628 | -0.373349953 | -0.02170614  | 0.662875349  |

|                     |    |            |             |        |       |             |        |        |      |              |              |              |              |
|---------------------|----|------------|-------------|--------|-------|-------------|--------|--------|------|--------------|--------------|--------------|--------------|
| Cahokia Grand Plaza | 20 | Moorehead  | Rectilinear | 5.543  | 3.965 | 1.397982346 | 18.134 | 21.558 | 3.07 | -0.868684388 | -0.530560681 | -0.241742699 | 0.170199874  |
| Cahokia Grand Plaza | 21 | Lohmann    | Rectilinear | 3.671  | 3.056 | 1.201243455 | 12.323 | 10.524 | 2.35 | -0.246621008 | 0.210824836  | 0.468243292  | 0.743924509  |
| Cahokia Grand Plaza | 22 | TLW/EM     | Rectilinear | 3.709  | 2.346 | 1.580988917 | 12.182 | 8.769  | 2.17 | 0.122416283  | 0.349546505  | 0.667572336  | 1.20626526   |
| Cahokia Grand Plaza | 23 | TLW/EM     | Rectilinear | 3.338  | 2.424 | 1.377062706 | 11.516 | 8.075  | 2.09 | 0.100901815  | 0.451713284  | 0.737192492  | 1.134646122  |
| Cahokia Grand Plaza | 24 | TLW/EM     | Rectilinear | 3.154  | 2.566 | 1.229150429 | 11.439 | 8.085  | 2.09 | 0.027271083  | 0.467791348  | 0.729663757  | 1.024673344  |
| Cahokia Grand Plaza | 25 | Stirling   | Rectilinear | 5.204  | 3.255 | 1.598771121 | 16.912 | 16.925 | 2.83 | -0.528731736 | -0.312386421 | 0.00847745   | 0.559486329  |
| Cahokia Grand Plaza | 26 | Lohmann    | Rectilinear | 3.974  | 1.62  | 2.45308642  | 11.19  | 6.436  | 1.86 | 0.86654642   | 0.564749506  | 1.021962099  | 2.164669753  |
| Cahokia Grand Plaza | 27 | Moorehead  | Rectilinear | 4.582  | 4.116 | 1.113216715 | 17.393 | 18.843 | 2.94 | -0.880440719 | -0.369606657 | -0.126237269 | 0.088476628  |
| Cahokia Grand Plaza | 28 | TLW/EM     | Rectilinear | 3.371  | 2.049 | 1.645192777 | 9.982  | 6.566  | 1.88 | 0.444376964  | 0.632567545  | 0.960840312  | 1.54400083   |
| Cahokia Grand Plaza | 29 | Moorehead  | Rectilinear | 6.26   | 5.485 | 1.141294439 | 21.968 | 33.485 | 3.51 | -1.436463628 | -0.942658706 | -0.694808113 | -0.460647584 |
| Cahokia Grand Plaza | 30 | Moorehead  | Rectilinear | 6.746  | 6.354 | 1.061693421 | 24.247 | 41.346 | 3.72 | -1.686089015 | -1.144006075 | -0.908859805 | -0.729830941 |
| Cahokia Grand Plaza | 31 | Moorehead  | Rectilinear | 6.39   | 5.443 | 1.173984935 | 21.755 | 33.8   | 3.52 | -1.430190299 | -0.956212162 | -0.703144167 | -0.446342201 |
| Cahokia Grand Plaza | 32 | Moorehead  | L Structure | 12.562 | 3.902 | 3.21937468  | 37.569 | 61.532 | 4.12 | -1.011995284 | -1.778546028 | -1.199033829 | 0.474405074  |
| Cahokia Grand Plaza | 33 | Moorehead? | Circular    | n/a    | n/a   | n/a         | 15.115 | 17.946 | 2.89 | -0.878649622 | -0.309079723 | -0.081166625 | 0.066473174  |
| Cahokia Grand Plaza | 34 | Lohmann    | Rectilinear | 3.849  | 3.021 | 1.27408143  | 13.726 | 11.607 | 2.45 | -0.310362264 | 0.102907349  | 0.371950745  | 0.698079543  |
| Cahokia Grand Plaza | 35 | Lohmann?   | Circular    | 4.631  | 3.844 | 1.204734651 | 13.814 | 14.352 | 2.66 | -0.554883091 | -0.099554657 | 0.158420994  | 0.436520213  |
| Cahokia Grand Plaza | 36 | Moorehead  | L Structure | 8.089  | 5.482 | 1.475556366 | 31.286 | 52.266 | 3.96 | -1.720068041 | -1.428992977 | -1.127794181 | -0.662123842 |
| Cahokia Grand Plaza | 37 | TLW/EM?    | Circular    | n/a    | n/a   | n/a         | 8.957  | 6.368  | 1.85 | 0.1532       | 0.7327       | 0.958        | 1.0943       |
| Cahokia Grand Plaza | 38 | Stirling   | Rectilinear | 5.377  | 3.297 | 1.630876554 | 17.346 | 17.719 | 2.87 | -0.552749651 | -0.355876281 | -0.029888383 | 0.543356718  |
| Cahokia Grand Plaza | 39 | TLW/EM     | Rectilinear | 3.263  | 2.569 | 1.270144025 | 11.672 | 8.393  | 2.13 | 0.007677696  | 0.423335344  | 0.691750331  | 1.015152083  |
| Cahokia Grand Plaza | 40 | TLW/EM     | Rectilinear | 1.944  | 1.005 | 1.934328358 | 5.839  | 1.943  | 0.66 | 1.808308657  | 1.821138507  | 2.195557313  | 2.978973134  |
| Cahokia Grand Plaza | 41 | Moorehead  | L Structure | 4.254  | 3.602 | 1.18101055  | 20.217 | 18.267 | 2.91 | -0.816692948 | -0.346975847 | -0.092786563 | 0.168881344  |
| Cahokia Grand Plaza | 42 | Lohmann    | Rectilinear | 2.848  | 1.298 | 2.194144838 | 8.373  | 3.725  | 1.32 | 1.2776453    | 1.132896456  | 1.548781972  | 2.512146687  |
| Cahokia Grand Plaza | 43 | TLW/EM?    | Circular    | n/a    | n/a   | n/a         | 9.822  | 7.368  | 2    | 0.025228084  | 0.57788993   | 0.810252369  | 0.977200523  |
| Cahokia Grand Plaza | 44 | TLW/EM     | Rectilinear | 4.234  | 2.443 | 1.733115023 | 12.592 | 10.187 | 2.32 | 0.048144658  | 0.183010397  | 0.525315555  | 1.169371019  |
| Cahokia Grand Plaza | 45 | TLW/EM     | Rectilinear | 3.776  | 2.317 | 1.629693569 | 11.498 | 8.46   | 2.14 | 0.176661459  | 0.374252309  | 0.700051403  | 1.272477169  |

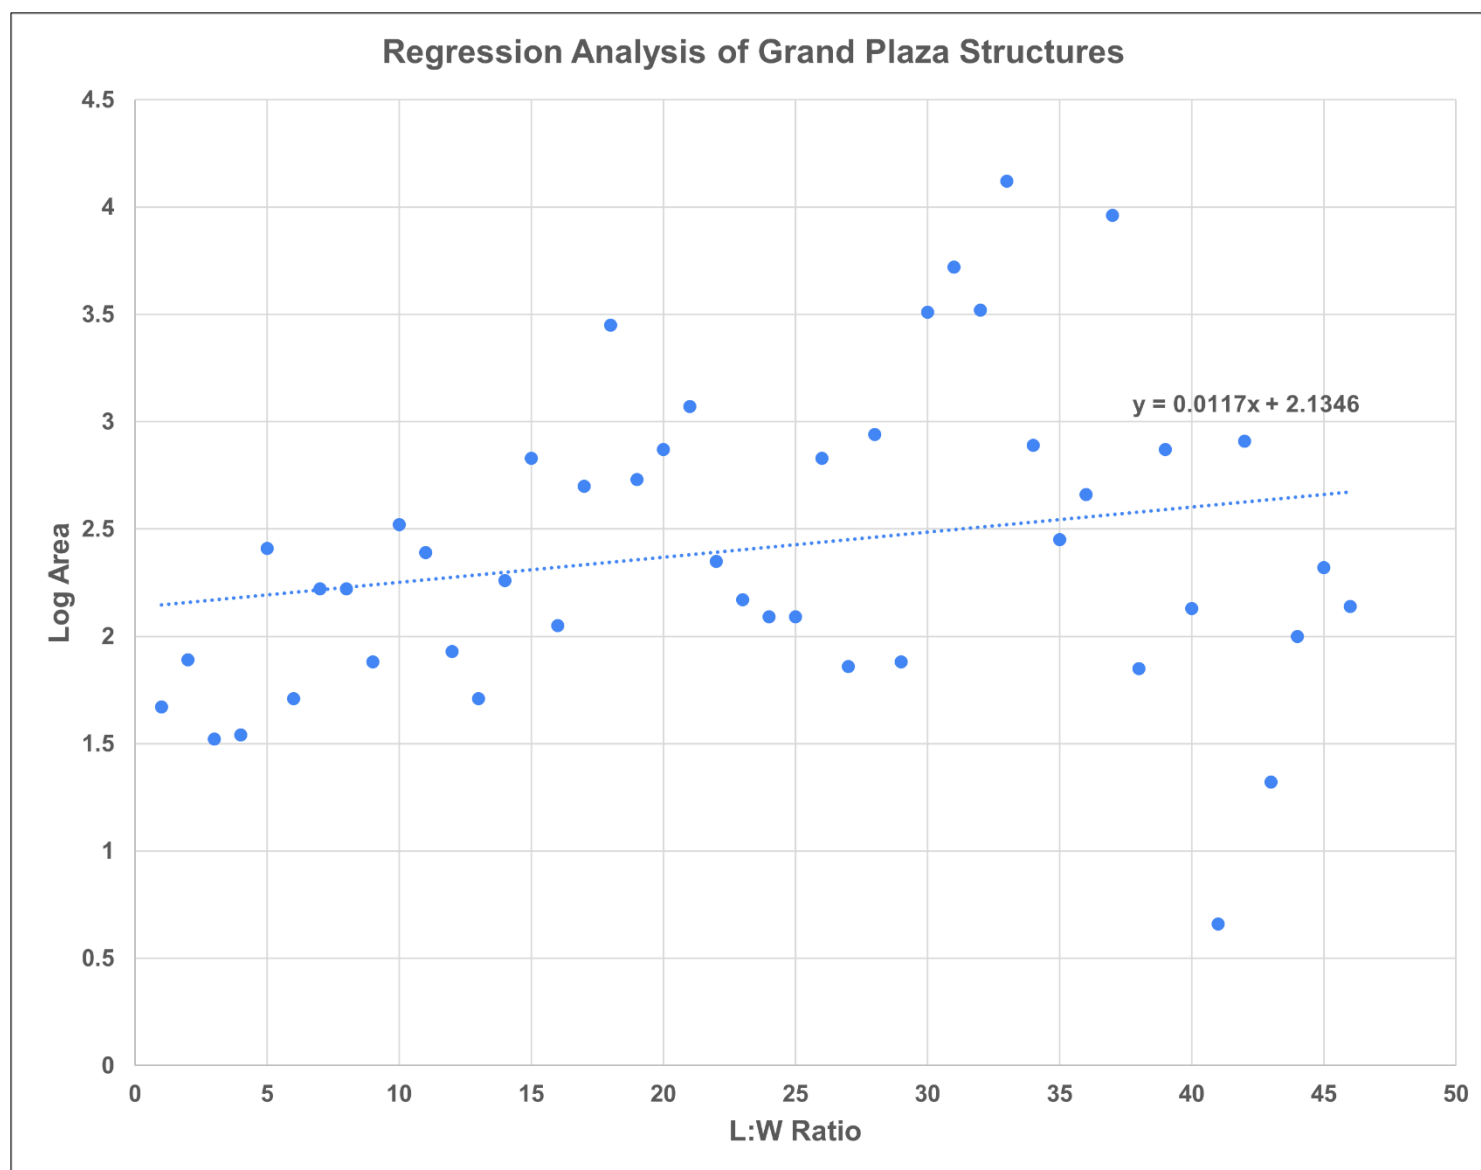

**Figure S1.** Best fit regression line produced from our linear regression analysis of structures we identified in the Grand Plaza.
